# Supplementary material for: Winners always win: growth of a wide range of plant species from low to future high CO 2
Source: PubMed Central journal article supplement (PMC4662314; doi:10.1002/ece3.1687), 2015-10-15
Supplement: ECE3-5-4949-s001.pdf [file ECE3-5-4949-s001.pdf]

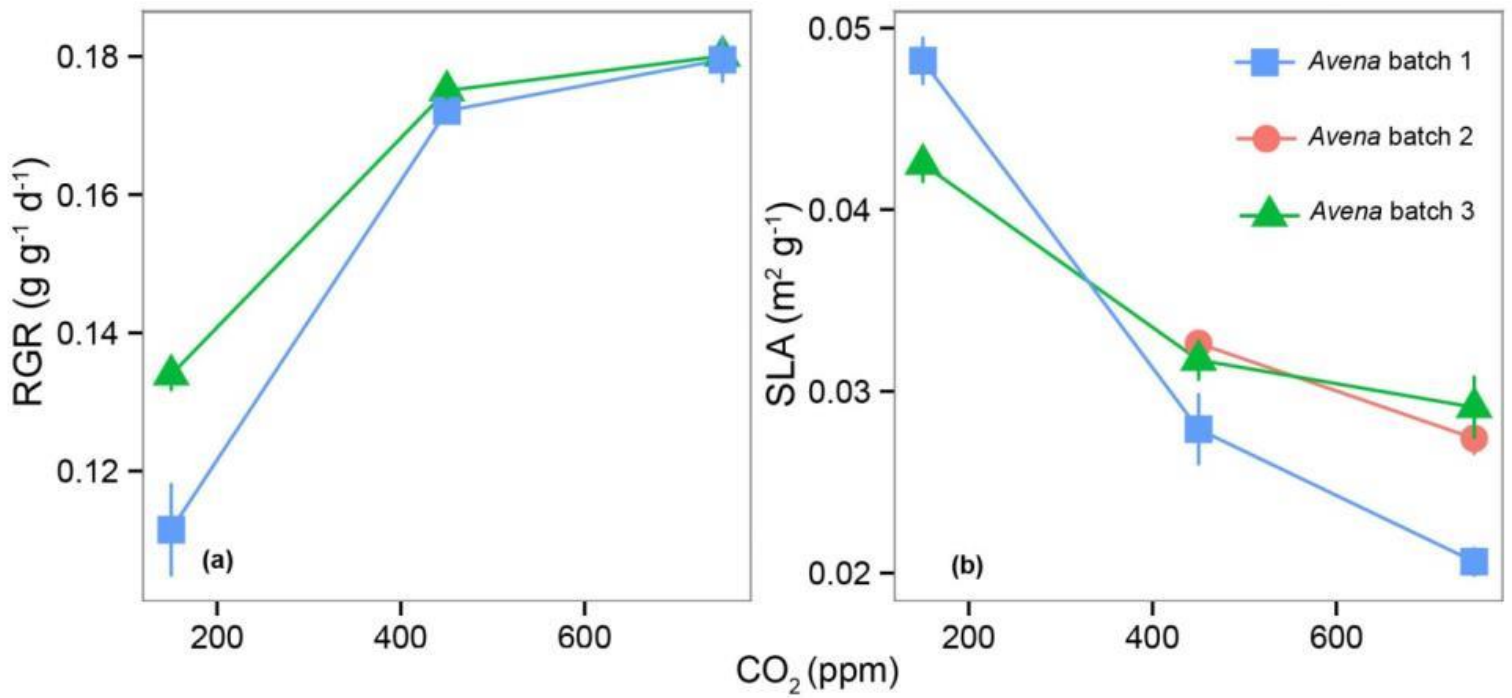

**Figure S1** Response of multiple batches of *Avena sativa* to CO<sub>2</sub> grown at different times during the experiment. **(a)**: Relative growth rate (RGR), **(b)**: specific leaf area (SLA). Plants in batch 1 were for a pilot experiment, batch 2 had missing low CO<sub>2</sub> data, batch 3 was used for the main results

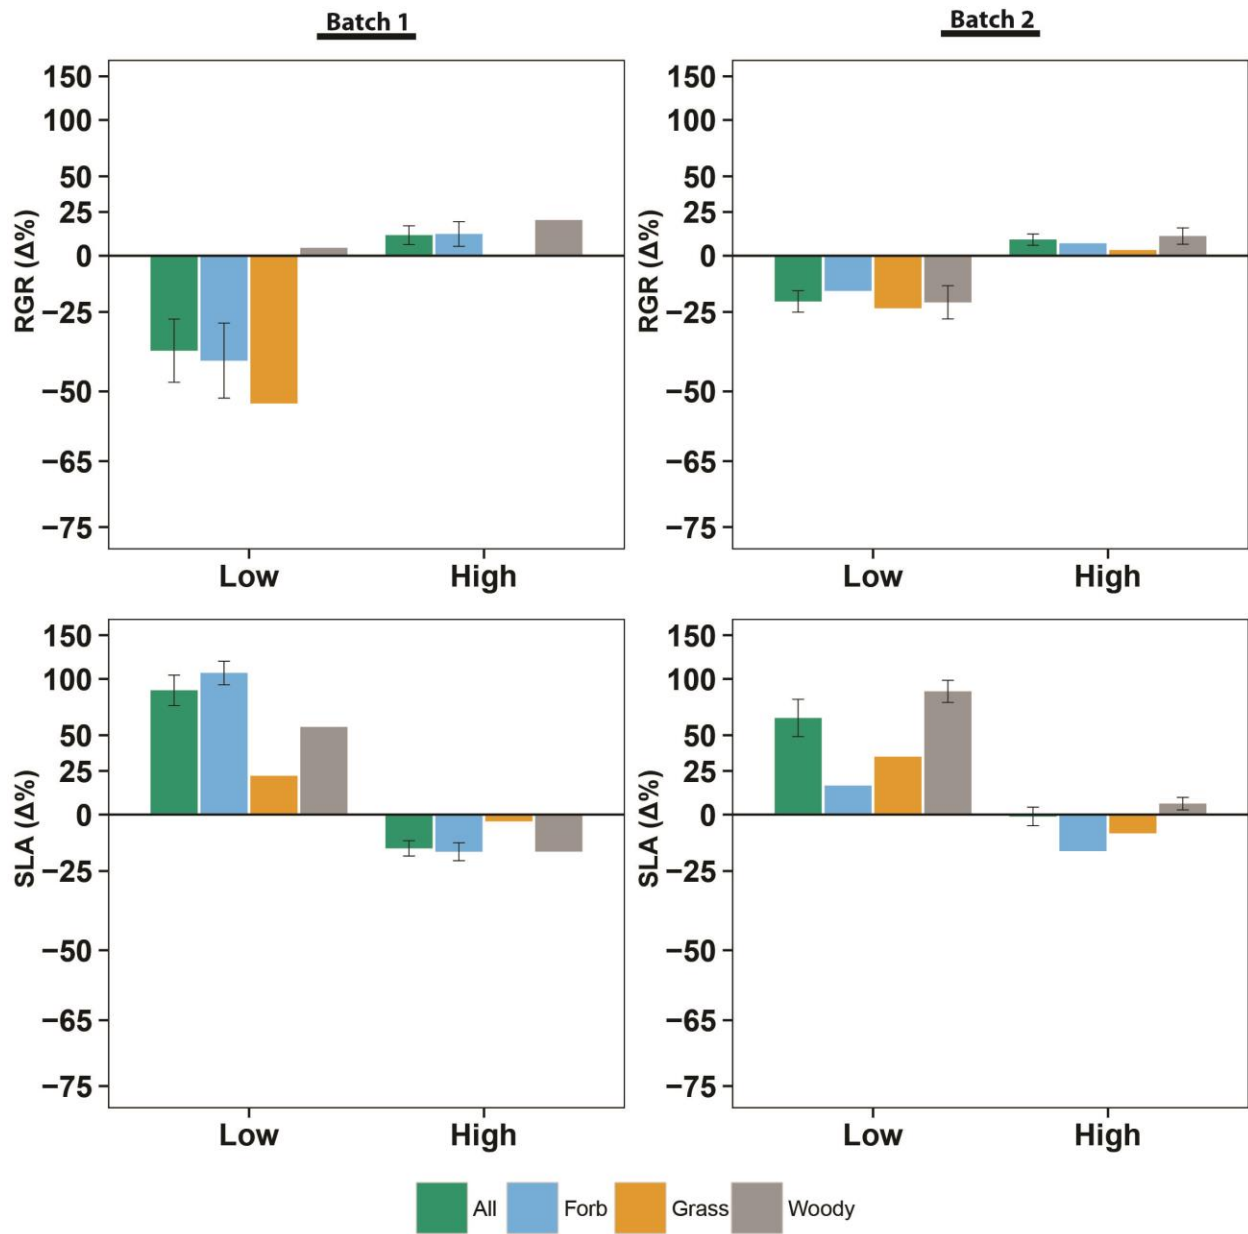

**Figure S2** Comparison of RGR and SLA response to CO<sub>2</sub> of two batches of different species grown at different times. Relative shift in trait level at low or high CO<sub>2</sub> compared to ambient CO<sub>2</sub> for forb, grass and woody species. Bars indicate percentage shift in trait value at low CO<sub>2</sub> (160 ppm) and high (750 ppm) CO<sub>2</sub> compared to trait value at ambient (450ppm) CO<sub>2</sub>. Axes are natural log transformed so that the size of the bars at a 50% decrease or a 100% increase is the same (reflecting a factor 2 adjustment). Green bars: all species, blue bars: forb species, orange bars: grass species, grey bars: woody species. Error bars give SE if there are multiple species per type.

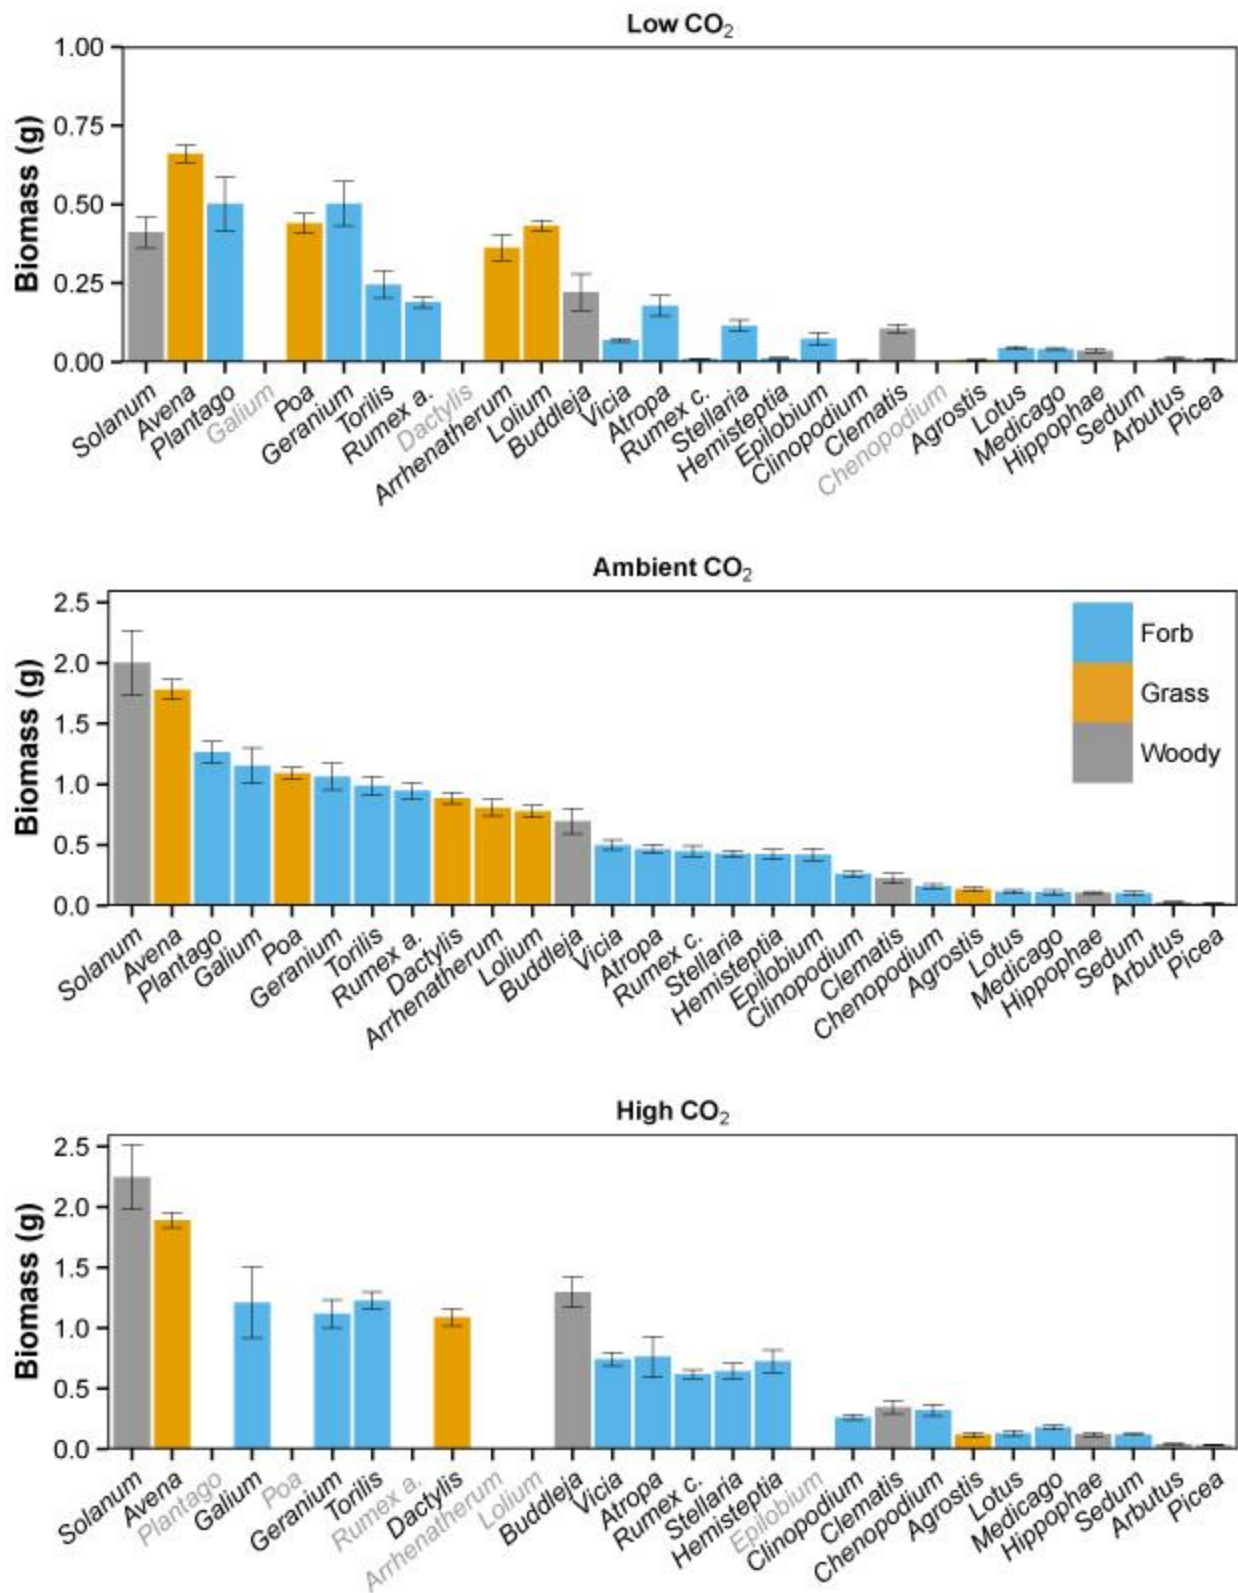

**Figure S3** Plant species biomass (g) ranking at 160 ppm, 450 ppm and 750 ppm CO<sub>2</sub>. Species are ordered by RGR at 450 ppm CO<sub>2</sub>. Light grey species names indicate species is missing at this CO<sub>2</sub> treatment. Note the different axis scale at low CO<sub>2</sub>. Orange bars: grass species, blue bars: forb species, grey bars: woody species. Error bars denote SE.

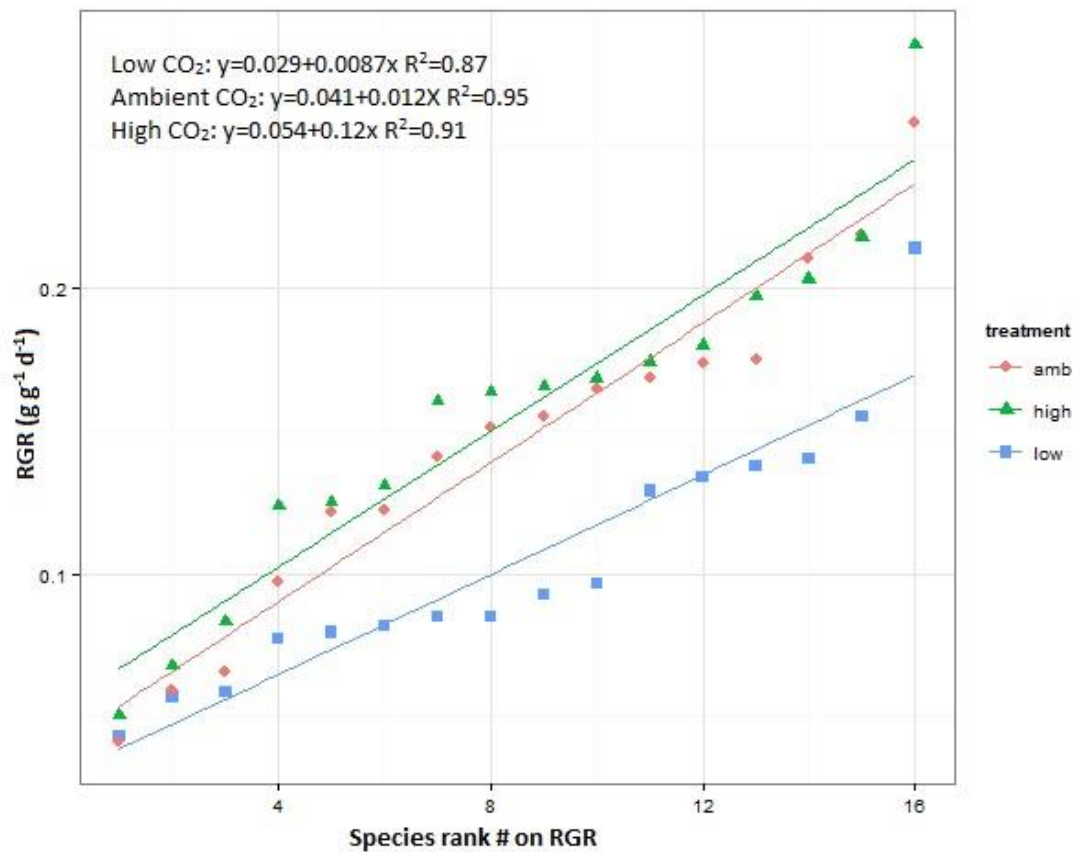

**Figure S4** Plant relative growth rate rank vs Relative Growth Rate at 160 ppm, 450 ppm and 750 ppm CO<sub>2</sub>. Species are ordered by RGR from low to high at each CO<sub>2</sub> level. The slope between rank and RGR is significantly lower than the slopes at ambient and high CO<sub>2</sub> ( $p<0.05$ ) which shows that the difference between the fastest and slowest grower is reduced. Red: 450 ppm, Green: 750 ppm, Blue: 160 ppm

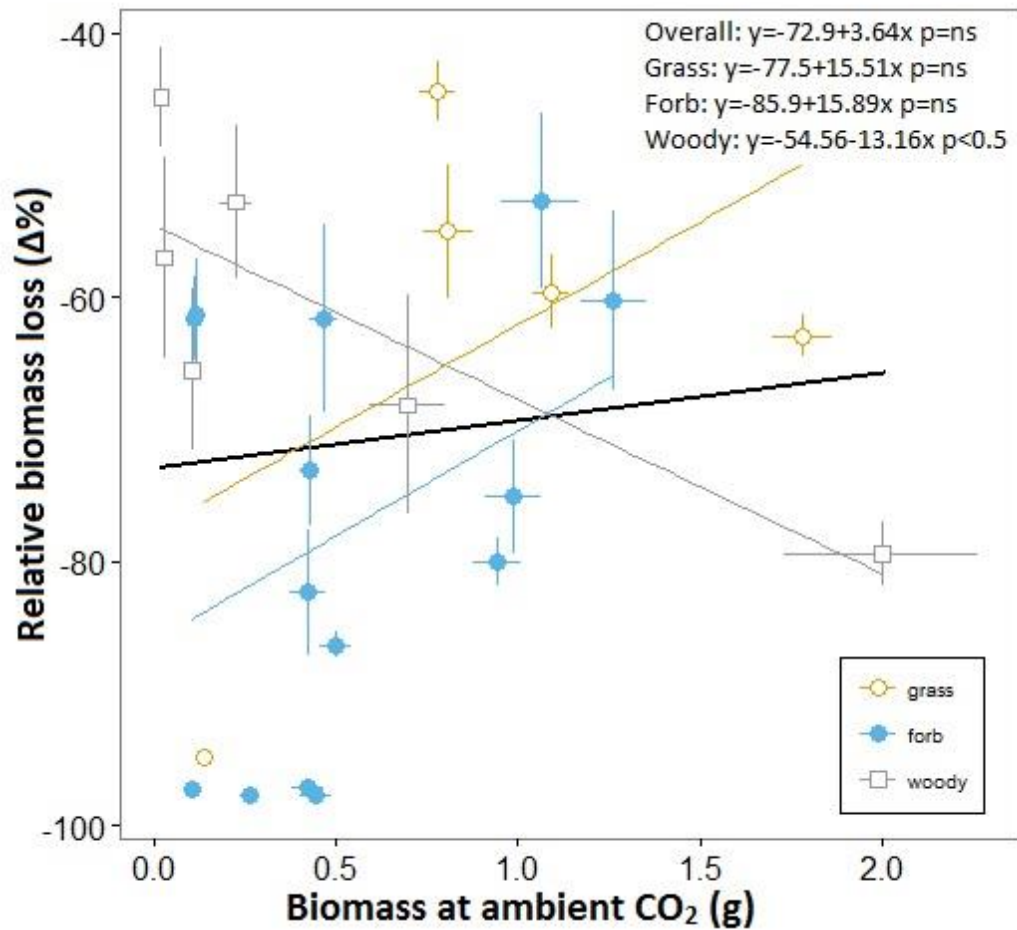

**Figure S5** Relative amount of biomass lost at low (160) CO<sub>2</sub> as compared to ambient CO<sub>2</sub>. Relative biomass difference (Δ%) at low CO<sub>2</sub> shows no relationship with biomass at ambient CO<sub>2</sub>. Blue circles: forb species, orange open circles: grass species, grey open squares: woody species, Black line: overall regression. Error bars give SE

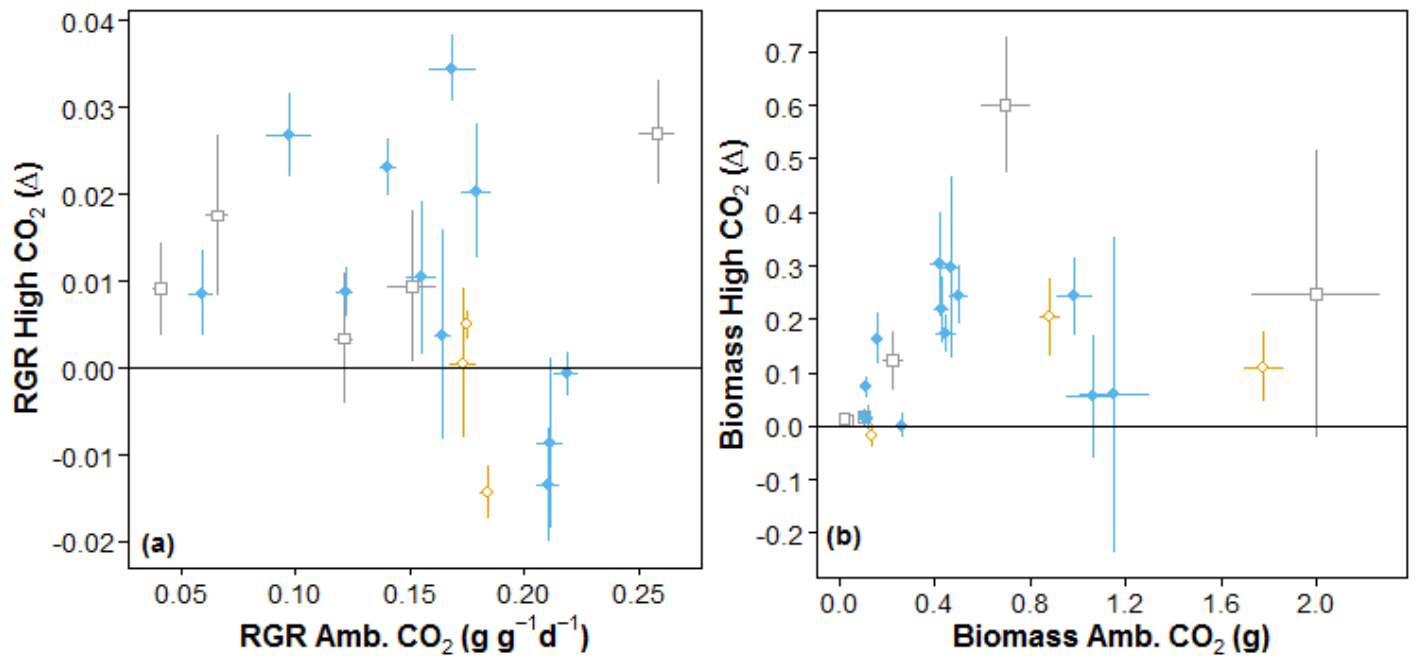

**Figure S6** Difference in growth rate and plant biomass at future high (750 ppm) CO<sub>2</sub> compared to current ambient (450 ppm) CO<sub>2</sub>. **a.** Relative Growth Rate difference at low CO<sub>2</sub> shows no relationship to growth rate at ambient CO<sub>2</sub>. **b.** Biomass difference at low CO<sub>2</sub> shows no relationship with biomass at ambient CO<sub>2</sub>. Blue circles: forb species, orange open circles: grass species, grey open squares: woody species. Error bars give SE

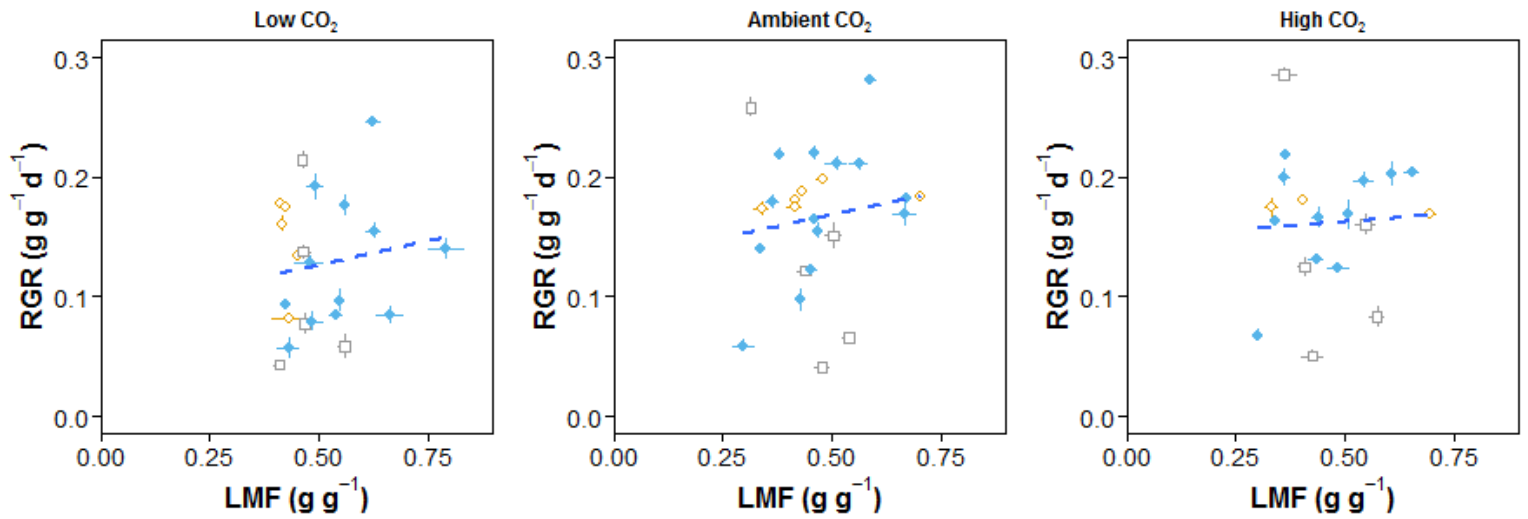

**Figure S7** Relationship between leaf mass fraction (LMF) and relative growth rate (RGR) at past low (160 ppm), current ambient (450 ppm) and future high (750 ppm) CO<sub>2</sub>. No significant relationship between LMF and RGR was found. Points indicate species mean RGR and LMF with SE; Blue circles: forb species, orange open circles: grass species, grey open squares: woody species.
